# Supplementary material for: Long non-coding RNA00844 inhibits MAPK signaling to suppress the progression of hepatocellular carcinoma by targeting AZGP1
Source: PubMed Central journal article supplement — Ann Transl Med. 2020 Nov;8(21):1365. doi: 10.21037/atm-20-3848 (PMC7723597; doi:10.21037/atm-20-3848), 2020-11
Supplement: atm-08-21-1365-dss.pdf [file atm-08-21-1365-dss.pdf]

## Data Sharing Statement

|                     |                                                                                                                                                    |                                                                                                                                                                                                        |
|---------------------|----------------------------------------------------------------------------------------------------------------------------------------------------|--------------------------------------------------------------------------------------------------------------------------------------------------------------------------------------------------------|
| <b>Article Info</b> | <a href="http://dx.doi.org/10.21037/atm-20-3848">http://dx.doi.org/10.21037/atm-20-3848</a>                                                        |                                                                                                                                                                                                        |
| <b>Item</b>         | <b>Question</b>                                                                                                                                    | <b>Authors' Response<br/>(place "-" if not applicable)</b>                                                                                                                                             |
| 1                   | Would you like to share data collected for your study to others?                                                                                   | Yes                                                                                                                                                                                                    |
| 2                   | If not, would you like to share the reason for your decision?                                                                                      | -                                                                                                                                                                                                      |
| 3                   | What data in particular will be shared?                                                                                                            | The survival data in particular will be shared, and we also found a correlation between the expressional level of LINC00844 and survival outcomes, which has seldom been provided in previous studies. |
| 4                   | Any other documents will be share? Such as study protocol, statistical analysis plan, informed consent form, clinical study report, analytic code. | Statistical analysis plan, informed consent form will also be shared if requested.                                                                                                                     |
| 5                   | When will data availability begin?                                                                                                                 | From the publication date.                                                                                                                                                                             |
| 6                   | When will data availability end?                                                                                                                   | Two years within the publication date, since the technique or survival date may be updated over time.                                                                                                  |
| 7                   | To whom will you share the data?                                                                                                                   | Medical oncologists and general surgeons who are interested in studies of LincRNA.                                                                                                                     |
| 8                   | For what type of analysis or purpose?                                                                                                              | For analysis to evaluate the predictive value of LINC00844 in HCC cancer patients.                                                                                                                     |
| 9                   | How or where can the data/documents be obtained?                                                                                                   | Emails could be sent to the address below to obtain the shared data:<br>wlm@zju.edu.cn                                                                                                                 |
| 10                  | Any other restrictions?                                                                                                                            | -                                                                                                                                                                                                      |
