# Supplementary material for: Long non-coding RNA00844 inhibits MAPK signaling to suppress the progression of hepatocellular carcinoma by targeting AZGP1
Source: PubMed Central journal article supplement — Ann Transl Med. 2020 Nov;8(21):1365. doi: 10.21037/atm-20-3848 (PMC7723597; doi:10.21037/atm-20-3848), 2020-11
Supplement: atm-08-21-1365-supplementary.pdf [file atm-08-21-1365-supplementary.pdf]

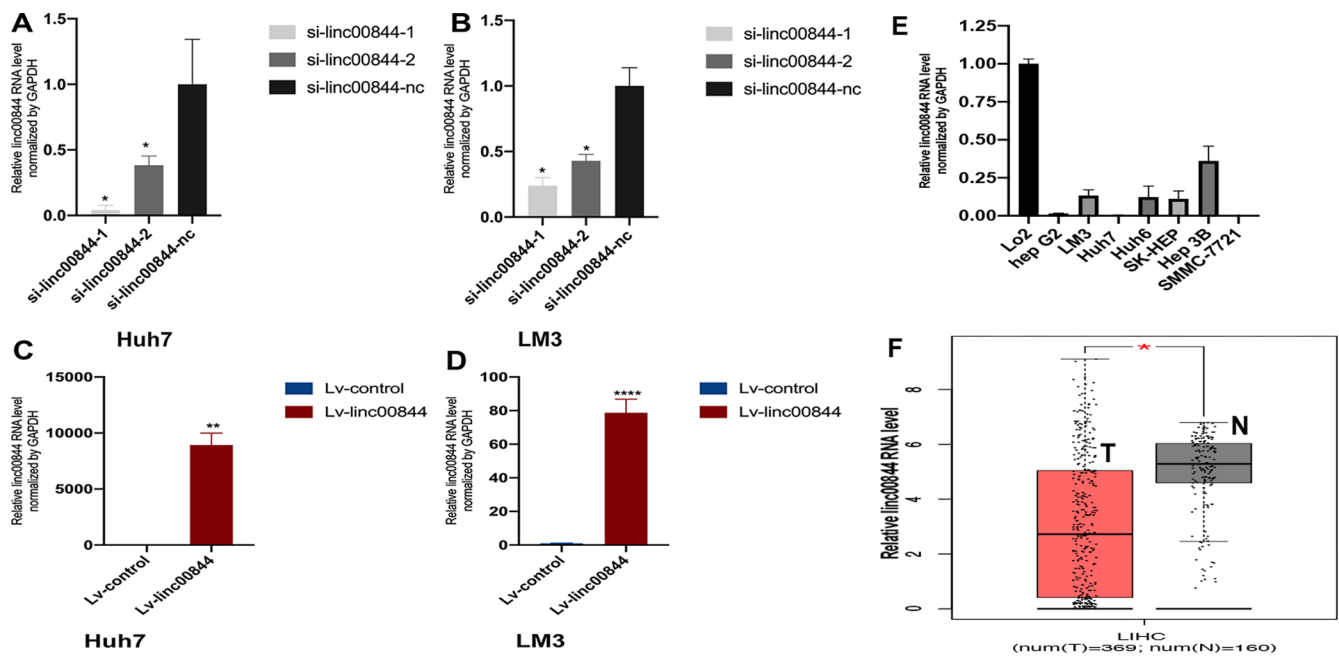

**Figure S1** Specific siRNA targeting LINC00844 (A,B) and LINC00844 lentivirus (C,D) were respectively used to inhibit or upregulate LINC00844 expression. (E) The expressional level of lincRNA00844 in a panel of HCC cell lines. (F) The expression patterns of lincRNA00844 in TCGA HCC dataset. LINC00844, long non-coding RNA00844; HCC, hepatocellular carcinoma; TCGA, The Cancer Genome Atlas.
